# Supplementary material for: Ordered mesoporous V2O5/WO3composite catalysts for efficient oxidation of aryl alcohols
Source: Royal Society of Chemistry journal article supplement (doi:10.1039/c4ra07850k), 2014-09-11
Supplement: c4ra07850k1.pdf [file c4ra07850k1.pdf]

## Electronic Supplementary Information

# Ordered Mesoporous V<sub>2</sub>O<sub>5</sub>–WO<sub>3</sub> Composite Catalysts for Efficient Oxidation of Aryl Alcohols

Euaggelia Skliri<sup>a</sup>, Ioannis N. Lykakis<sup>b</sup> and Gerasimos S. Armatas<sup>\*a</sup>

<sup>a</sup> *Department of Materials Science and Technology, University of Crete, Voutes GR-71003, Heraklion, Greece.*

<sup>b</sup> *Department of Chemistry, Aristotle University of Thessaloniki, University Campus GR-54124, Thessaloniki, Greece.*

\*E-mail: [garmatas@materials.uoc.gr](mailto:garmatas@materials.uoc.gr).

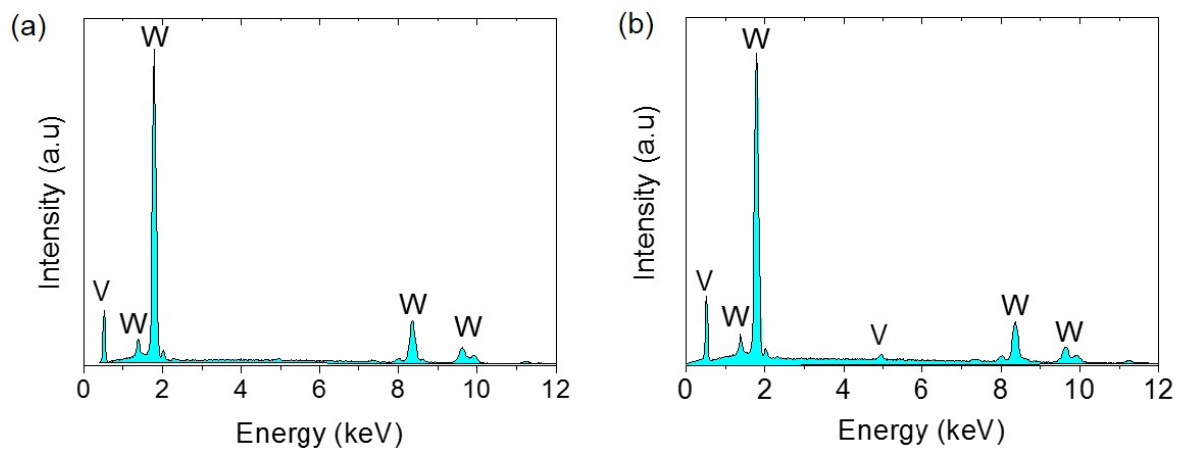

**Fig. S1** Typical EDS spectra of mesoporous  $\text{WO}_3$  materials containing (a) 1% and (b) 4%  $\text{V}_2\text{O}_5$ . The EDS spectra show an average atomic ratio W/V of  $\sim 97.5:2.5$  and  $\sim 90.9:9.1$  that corresponds to a  $\sim 1$  wt % and  $\sim 3.8$  wt %  $\text{V}_2\text{O}_5$  loading for 1%  $\text{V}_2\text{O}_5/\text{WO}_3$  and 4%  $\text{V}_2\text{O}_5/\text{WO}_3$  composites, respectively.

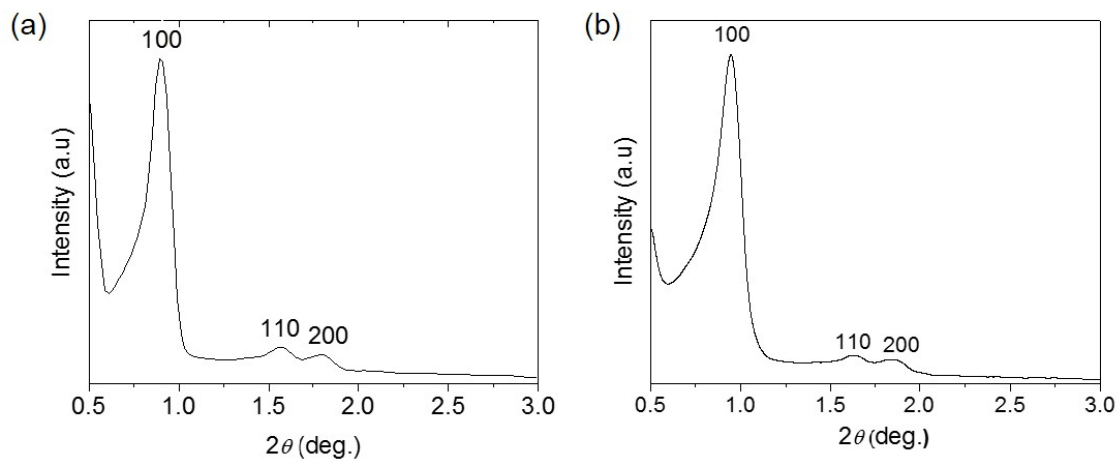

**Fig. S2** Low-angle XRD patterns of mesoporous (a) SBA-15 and (b) APS/SBA-15 materials. The indexing of the Bragg diffractions is consisted with a hexagonal  $p6mm$  unit cell with lattice parameter  $a_0 \sim 11.1$  nm for SBA-15 and  $\sim 10.7$  nm for APS/SBA-15.

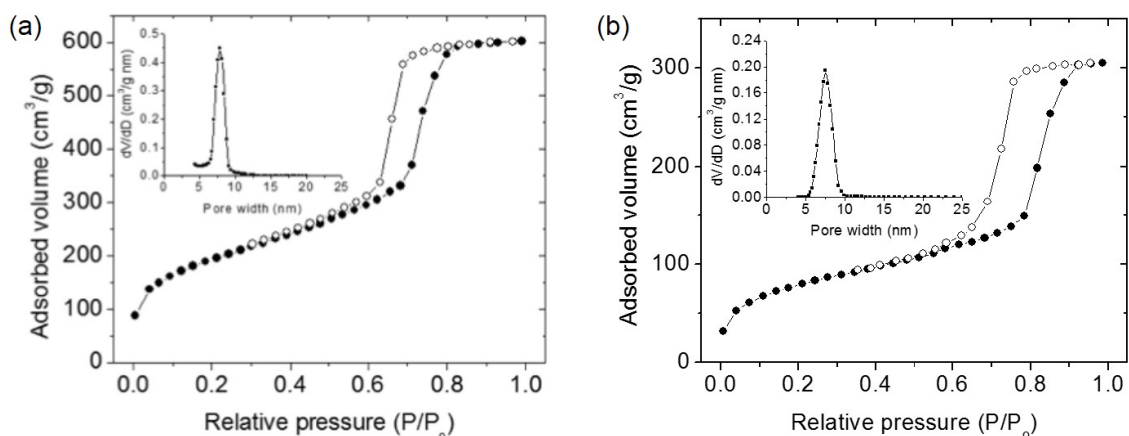

**Fig. S3** Nitrogen adsorption–desorption isotherms and the corresponding NLDFT pore size distribution (inset) for mesoporous (a) SBA-15 and (b) NH<sub>2</sub>-functionalized SBA-15 (APS/SBA-15) materials. The SBA-15 shows specific surface area of 676 m<sup>2</sup>g<sup>-1</sup>, total pore volume of 0.96 cm<sup>3</sup>g<sup>-1</sup> and narrow pore size distribution with pore width of 7.8 nm. The APS/SBA-15 shows specific surface area of 286 m<sup>2</sup>g<sup>-1</sup>, total pore volume of 0.96 cm<sup>3</sup>g<sup>-1</sup> and narrow distribution of pore size with pore width of 7.4 nm. The pore wall thickness of modified silica (APS/SBA-15), estimated by the equation  $WT = a_0 - D_p$ , is about 3.3 nm.

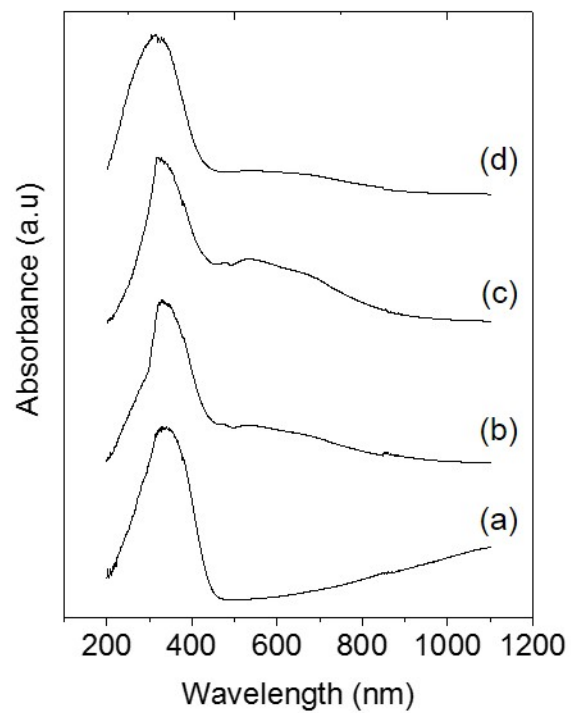

**Fig. S4** Diffuse reflectance ultraviolet-visible (UV-vis) spectra of mesoporous (a) *meso*-WO<sub>3</sub> and (b) 1% V<sub>2</sub>O<sub>5</sub>/WO<sub>3</sub>, (c) 4% V<sub>2</sub>O<sub>5</sub>/WO<sub>3</sub> and (d) 6% V<sub>2</sub>O<sub>5</sub>/WO<sub>3</sub> composite materials.

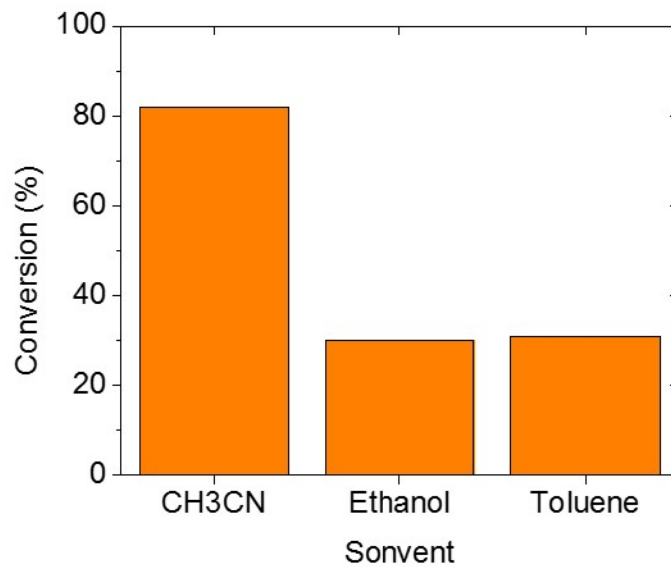

**Fig. S5** Oxidation of 1-phenylethanol with 4%  $V_2O_5/WO_3$  catalyst in different solvents. *Reaction conditions:* 0.1 mmol 1-phenylethanol, 50 mg catalyst, 40 equiv. *t*-BuOOH, 2 mL solvent, 50 °C, 4 h.

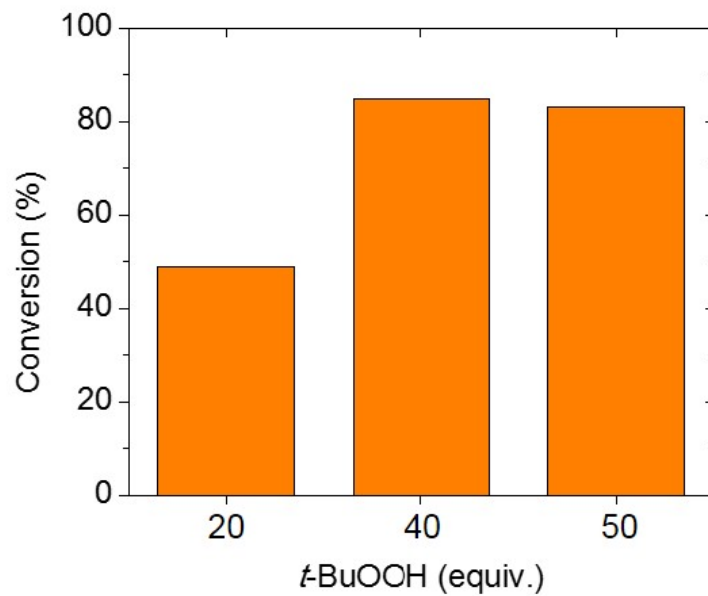

**Fig. S6** Oxidation of 1-phenylethanol with 4%  $V_2O_5/WO_3$  catalyst, using various equivalents of *t*-BuOOH oxidant. *Reaction conditions:* 0.1 mmol 1-phenylethanol, 50 mg catalyst, 2 mL  $CH_3CN$ , 50 °C, 2 h.

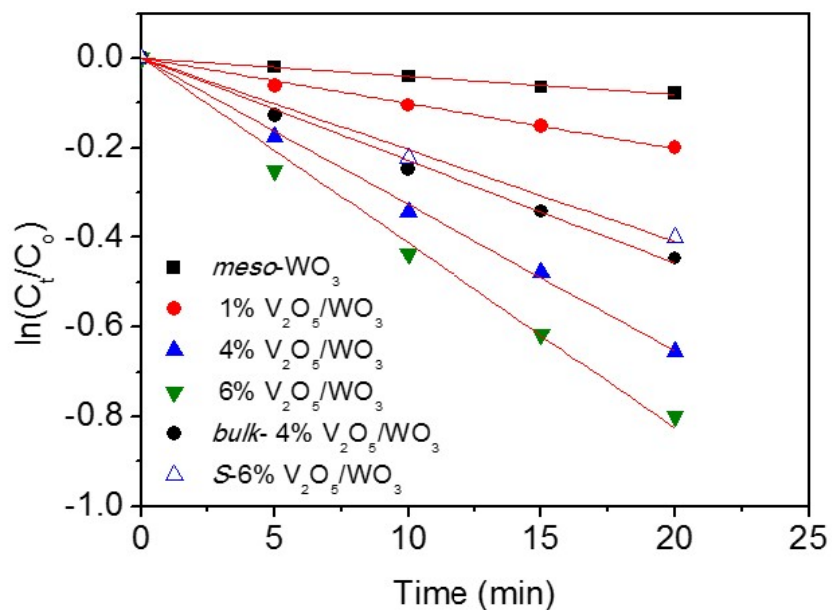

**Fig. S7** Kinetic profiles (where  $C_0$  and  $C_t$  are the concentrations of 1-phenylethanol at the initial state of reaction and at the time  $t$ , respectively) of the oxidation of 1-phenylethanol catalyzed by mesoporous  $meso-WO_3$ ,  $x\% V_2O_5/WO_3$  ( $x= 1, 4$  and  $6$ ) and S- $4\% V_2O_5/WO_3$  materials and macroscopic *bulk*- $4\% V_2O_5/WO_3$  solid.



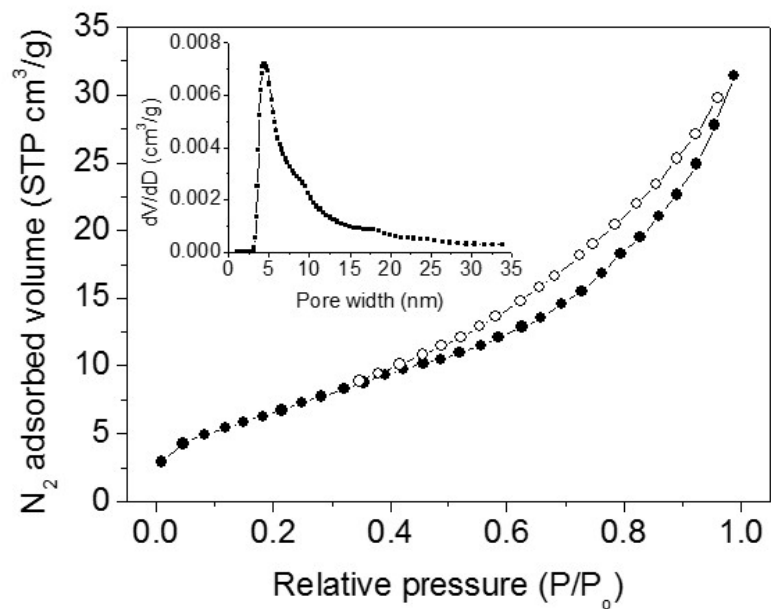

**Fig. S8** Nitrogen adsorption–desorption isotherms at 77K of reused 4% V<sub>2</sub>O<sub>5</sub>/WO<sub>3</sub> catalyst. Analysis of the adsorption data with the BET method gives surface area of 26 m<sup>2</sup>g<sup>-1</sup> and total pore volume of 0.05 cm<sup>3</sup>g<sup>-1</sup>. Inset: the corresponding NLDFT pore size distribution, indicating pore size of ~4.5 nm

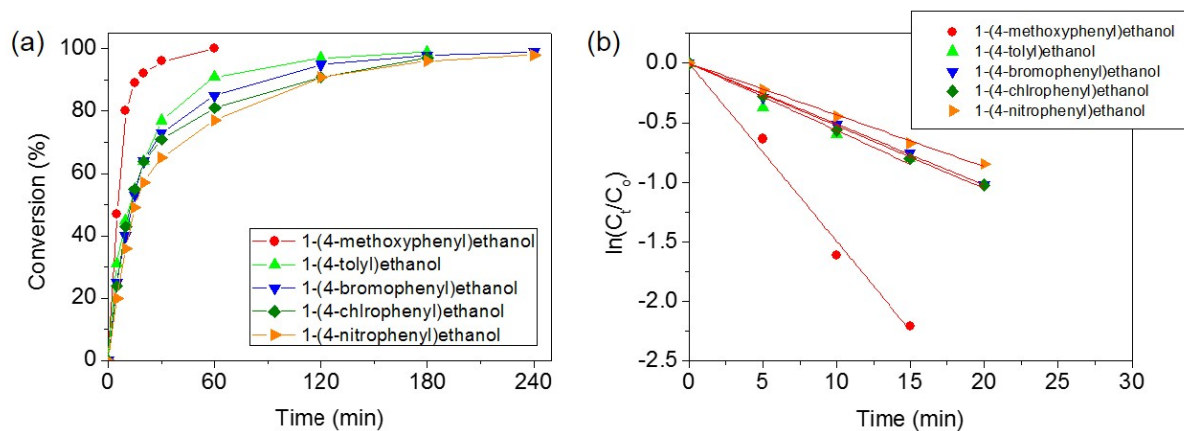

**Fig. S9** (a) Time evolution and (b) kinetic profiles (where  $C_0$  and  $C_t$  are the concentrations of substrate at the initial state of reaction and at the time  $t$ , respective) of the oxidation of various *para*-substituted benzyl alcohols catalyzed by mesoporous 4% V<sub>2</sub>O<sub>5</sub>/WO<sub>3</sub> catalyst. In panel b the corresponding red lines are fit to the data. *Reaction conditions*: 0.1 mmol substrate, 50 mg catalyst, 40 equiv. *t*-BuOOH, 2 mL CH<sub>3</sub>CN, 50 °C.
